# Supplementary material for: Arsenic-induced promoter hypomethylation and over-expression of ERCC2 reduces DNA repair capacity in humans by non-disjunction of the ERCC2–Cdk7 complex
Source: Royal Society of Chemistry journal article supplement (doi:10.1039/c3mt00328k), 2013-12-10
Supplement: c3mt00328k.pdf [file c3mt00328k.pdf]

## Supplementary Figures

Supplementary Figure 1

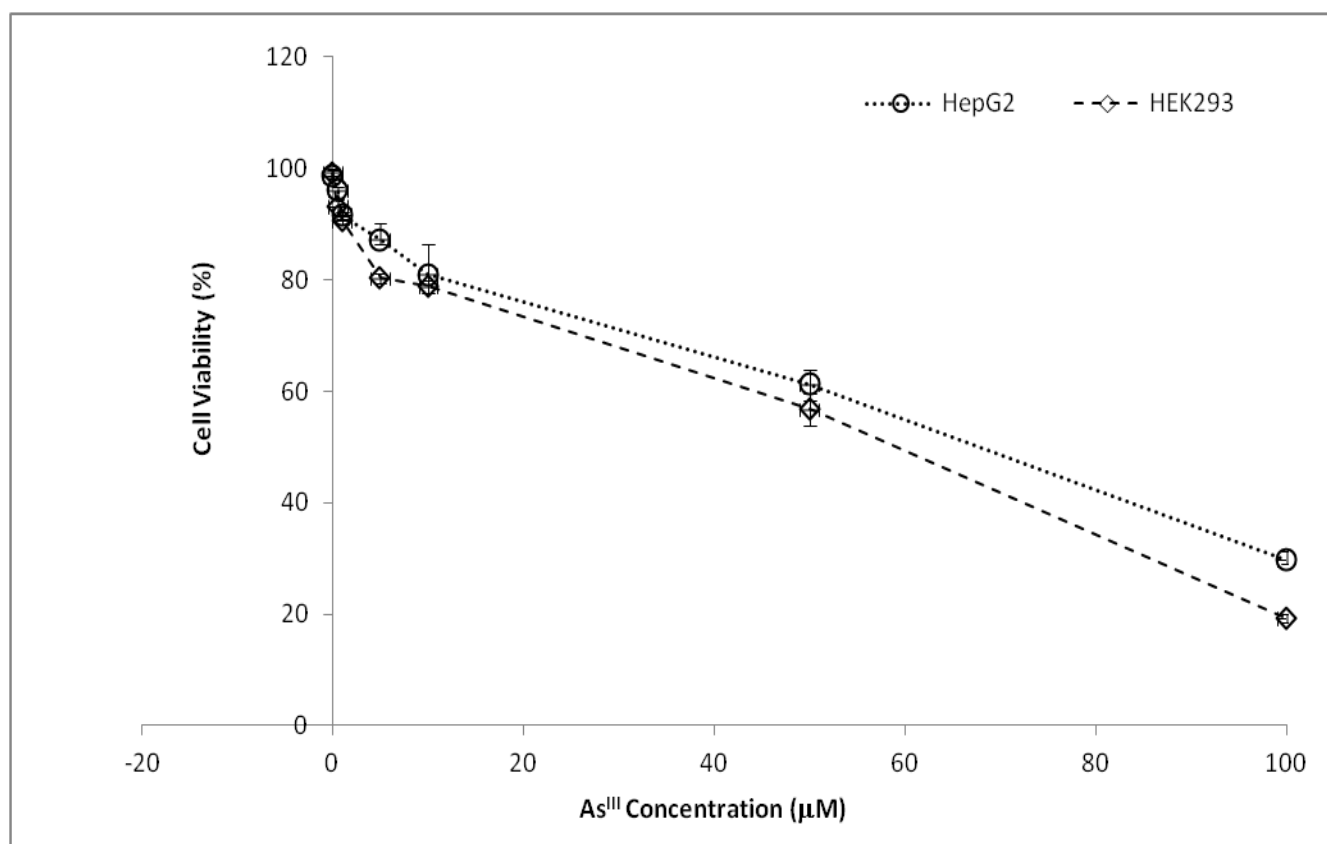

**Supplementary Figure S1:** Cell viability assay for HepG2 and HEK-293. It represents the mean viability percentage (Mean±SD) at different arsenic concentrations (0, 0.5, 1, 5, 10, 50 and 100 µM). We took a cut-off at 75% of cell viability for further experiments.

Supplementary Figure 2

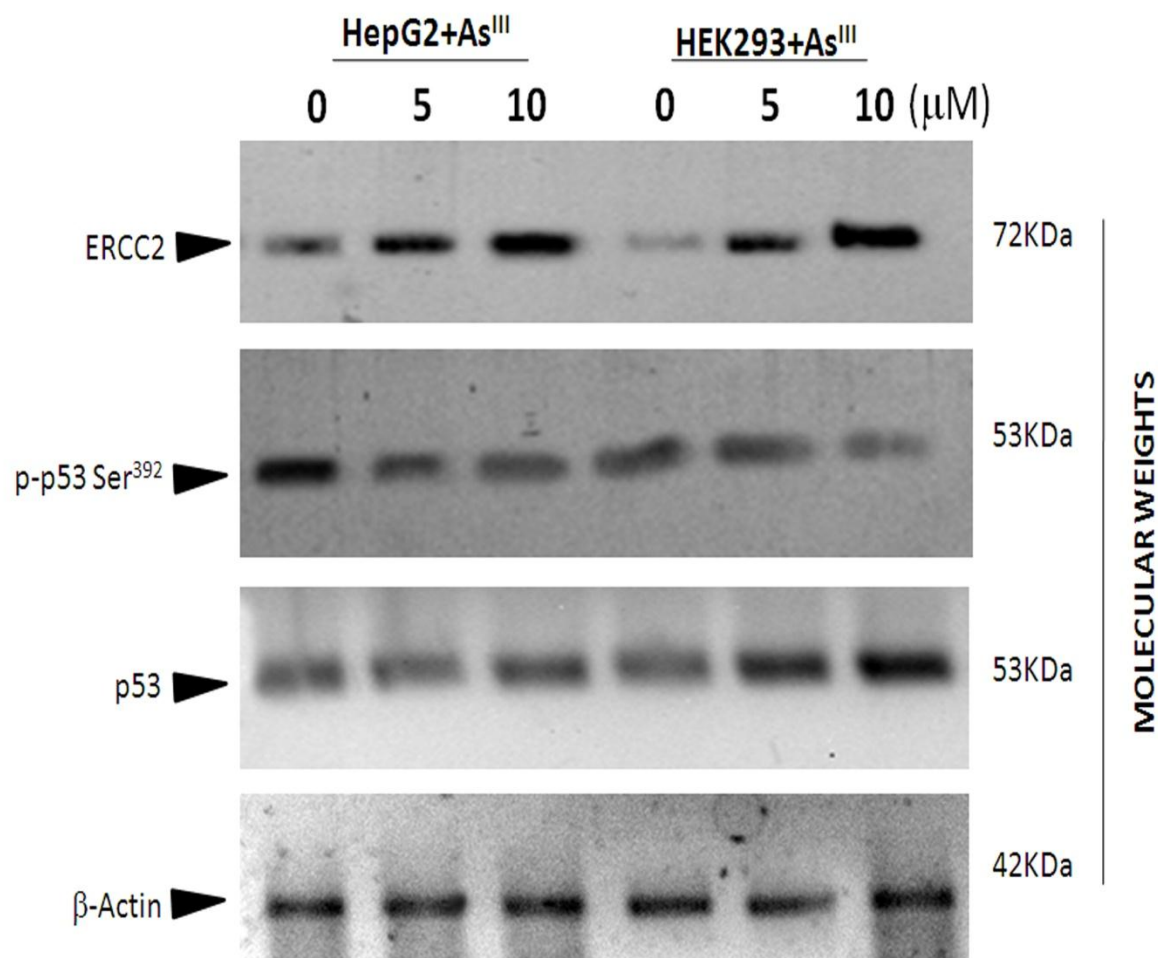

**Supplementary Figure S2:** Representative figure of western blot analysis from *in vitro* assay for the degree of p53 Ser<sup>392</sup> phosphorylation along with the ERCC2 expression status, in an increased dose of arsenic (As<sup>III</sup>). With an increase in ERCC2 expression, there is a decline in phosphorylation. This may be attributed due to decrease in cdk7-kinase activity, as overexpression of ERCC2 leads to impaired CAK activity by inhibiting it's release<sup>32</sup>.

Supplementary Figure S3:

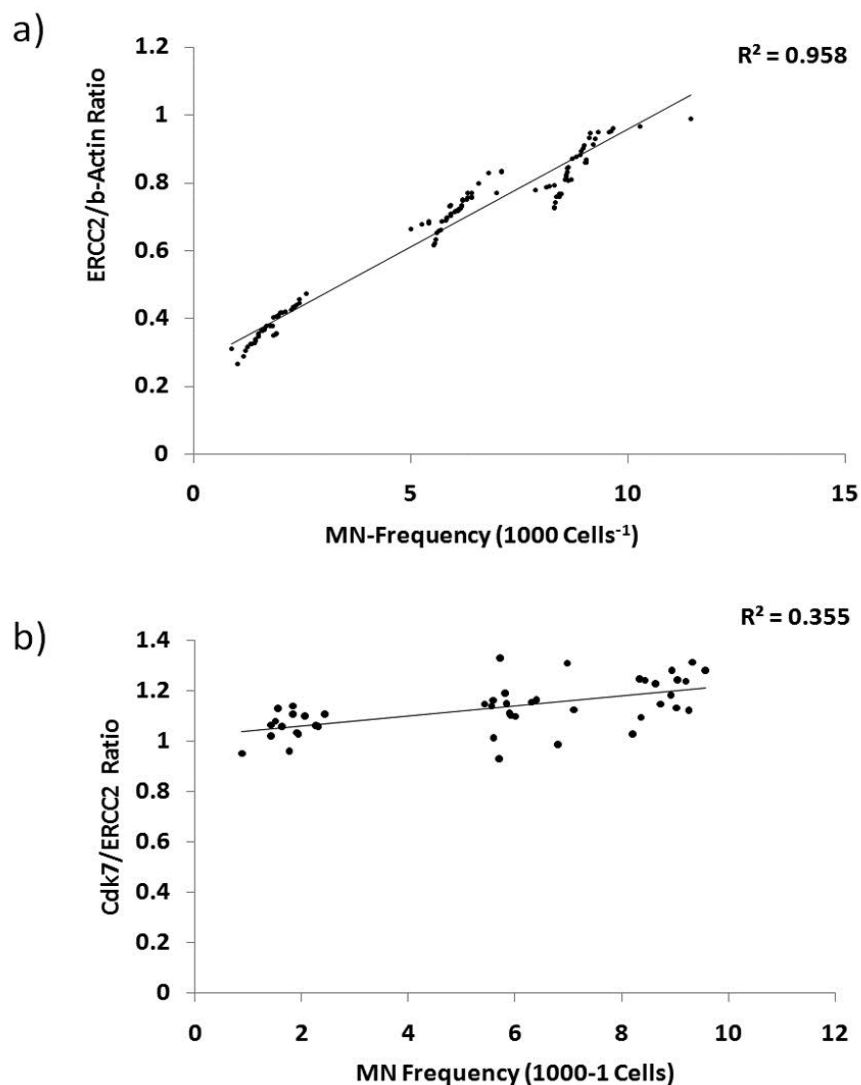

**Supplementary Figure S3:** The regression association between micronuclei frequency (MN Frequency) with a) degree of ERCC2 expression and b) degree of Cdk7/ERCC2 association.
